# Supplementary material for: Development of an Optimized MALDI-TOF-MS Method for High-Throughput Identification of High-Molecular-Weight Glutenin Subunits in Wheat
Source: Molecules. 2020 Sep 22;25(18):4347. doi: 10.3390/molecules25184347 (PMC7571055; doi:10.3390/molecules25184347)
Supplement: Supplementary file 1 [file molecules-25-04347-s001.zip › Supplementary Table 1.xlsx]

## Sheet: Sheet1
Table S1. Comparison of molecular weights of alkylated and non-alkylated 1Dy12, 1By8, 1Bx7 and 1Dx2 HMW-GS from Chinese Spring determined by MALDI-TOF-MS.
	MW (Da)
	1Dy12	1By8	1Bx7	1Dx2
Alkylated	69410.9	75886.1	83488.3	87493.5
Non-alkylated	68673.7	75171.2	83086.7	87067.8
Difference	737.2	714.9	401.6	425.7
4-vp1	105.3	102.1	100.4	106.4
1 Difference in molecular weight of alkylated and non-alkylated proteins divided by the number of cysteine residues in the protein. X-type and y-type HMW-GS have 4 and 7 cysteine residues, respectively.
