# Supplementary material for: Development of an Optimized MALDI-TOF-MS Method for High-Throughput Identification of High-Molecular-Weight Glutenin Subunits in Wheat
Source: Molecules. 2020 Sep 22;25(18):4347. doi: 10.3390/molecules25184347 (PMC7571055; doi:10.3390/molecules25184347)
Supplement: Supplementary file 1 [file molecules-25-04347-s001.zip › Supplementary Table 2.xlsx]

## Sheet: Sheet3
Table S2. Comparison of molecular weights of HMW-GS predicted from mature proteins deduced from gene sequences with actual molecular weights determined by MALDI-TOF-MS in Korean cultivars.
HMW-GS			Deduced MW from coding gene (Da) 1	MW by MALDI-TOF-MS (Da) 2	Cultivars	Difference (Da)	Error (%)
(Accesion number)
Glu-A1	x	1	87679	87548	Jokyung	-131	-0.149409
		(X61009)
		2*	86335	86197.4	Alchan	-137.56	-0.159333
		(M22208)		86185.4	Baekchal	-149.56	-0.173232
				86174.4	Baekjoong	-160.56	-0.185973
				86161.4	Dabun	-173.56	-0.201031
				86213.4	Dajoong	-121.56	-0.1408
				86180.4	Goso	-154.56	-0.179024
				86239.4	Hanbaek	-95.56	-0.110685
				86209.4	Hojoong	-125.56	-0.145433
				86238.4	Jeokjoong	-96.56	-0.111843
				86196.4	Joa	-138.56	-0.160491
				86211.4	Joongmo 2012	-123.56	-0.143117
				86159.4	Keumkang	-175.56	-0.203347
				86251.4	Olgeru	-83.56	-0.0967858
				86219.4	Sinmichal	-115.56	-0.133851
				86195.4	Suan	-139.56	-0.161649
				86238.4	Sukang	-96.56	-0.111843
				86207.4	Tapdong	-127.56	-0.14775
				86222.4	Younbaek	-112.56	-0.130376
Glu-B1	x	7 (group 1)	82527	82463.4	Anbaek	-63.56	-0.0770172
		(X13927)		82438.4	Baekchal	-88.56	-0.10731
				82484.4	Chungkye	-42.56	-0.051571
				82430.4	Eunpa	-96.56	-0.117004
				82482.4	Gobun	-44.56	-0.0539945
				82464.4	Hojoong	-62.56	-0.0758055
				82485.4	Jinpoom	-41.56	-0.0503593
				82491.4	Joa	-35.56	-0.0430889
				82453.4	Jonong	-73.56	-0.0891345
				82488.4	Namhae	-38.56	-0.0467241
				82447.4	Ol	-79.56	-0.0964048
				82477.4	Seodun	-49.56	-0.0600531
				82455.4	Sinmichal	-71.56	-0.086711
				82442.4	Sinmichal 1	-84.56	-0.102463
				82437.4	Suan	-89.56	-0.108522
				82462.4	Tapdong	-64.56	-0.0782289
		7 (group 2)	82527	83036.4	Alchan	509.44	0.617301
		(X13927)		83016.4	Dabun	489.44	0.593067
				83022.4	Dahong	495.44	0.600337
				83024.4	Geuru	497.44	0.60276
				83008.4	Goso	481.44	0.583373
				83070.4	Hanbaek	543.44	0.6585
				83012.4	Jokyung	485.44	0.58822
				83021.4	Joongmo 2012	494.44	0.599125
				83026.4	Keumkang	499.44	0.605184
				83026.4	Milsung	499.44	0.605184
				83040.4	Olgeuru	513.44	0.622148
				83013.4	Saeol	486.44	0.589431
				83040.4	Uri	513.44	0.622148
		13	83209	83056.4	Baekjoong	-152.56	-0.183346
		(EF540764)		83084.4	Dajoong	-124.56	-0.149695
				83066.4	Jeokjoong	-142.56	-0.171328
				83084.4	Joeun	-124.56	-0.149695
				83083.4	Jojoong	-125.56	-0.150897
				83069.4	Jopoom	-139.56	-0.167722
				83100.4	Sukang	-108.56	-0.130467
				83055.4	Younbaek	-153.56	-0.184547
		17	77960	78641	Joongmo 2008	681	0.0873525
		(AB263219)
	y	8	75159	75188	Alchan	29.02	0.0386115
		(AY245797)		75171	Chungkye	12.02	0.0159928
				75152	Dabun	-6.98	-0.00928698
				75171	Dahong	12.02	0.0159928
				75148	Geuru	-10.98	-0.014609
				75186	Goso	27.02	0.0359505
				75185	Hanbaek	26.02	0.0346199
				75189	Hojoong	30.02	0.039942
				75190	Jinpoom	31.02	0.0412725
				75196	Joa	37.02	0.0492556
				75165	Jokyung	6.02	0.00800969
				75159	Joongmo 2012	0.02	2.66103e-05
				75171	Keumkang	12.02	0.0159928
				75174	Milsung	15.02	0.0199843
				75175	Namhae	16.02	0.0213148
				75146	Ol	-12.98	-0.0172701
				75190	Olgeuru	31.02	0.0412725
				75188	Saeol	29.02	0.0386115
				75199	Seodun	40.02	0.0532471
				75182	Suan	23.02	0.0306284
				75205	Tapdong	46.02	0.0612302
				75187	Uri	28.02	0.037281
		8*	N/A	75137	Baekchal
				75172	Sinmichal
		9	73517	73586	Anbaek	69.02	0.093883
		(X61026)		73576	Eunpa	59.02	0.0802808
				73616	Gobun	99.02	0.13469
				73571	Jonong	54.02	0.0734796
				73591	Sinmichal 1	74.02	0.100684
		16	77283	77071	Baekjoong	-211.98	-0.274291
		(EF540765)		77121	Dajoong	-161.98	-0.209593
				77089	Jeokjoong	-193.98	-0.251
				77139	Joeun	-143.98	-0.186302
				77122	Jojoong	-160.98	-0.208299
				77122	Jopoom	-160.98	-0.208299
				77095	Sukang	-187.98	-0.243236
				77124	Younbaek	-158.98	-0.205711
		18	75187	75232	Joongmo 2008	45	0.0598508
		(KF430649)
Glu-D1	x	2	87007	87002.4	Anbaek	-4.56	-0.00524096
		(X03346)		87005.4	Gobun	-1.56	-0.00179296
				86999.4	Jonong	-7.56	-0.00868896
				86967.4	Sinmichal 1	-39.56	-0.0454676
				86989.4	Sukang	-17.56	-0.0201823
		2.2	100886	100413	Baekjoong	-472.56	-0.46841
		(AY159367)		100432	Chungkye	-453.56	-0.449577
				100413	Dabun	-472.56	-0.46841
				100400	Dahong	-485.56	-0.481296
				100413	Dajoong	-472.56	-0.46841
				100433	Eunpa	-452.56	-0.448586
				100407	Geuru	-478.56	-0.474357
				100416	Goso	-469.56	-0.465436
				100408	Hojoong	-477.56	-0.473366
				100404	Jeokjoong	-481.56	-0.477331
				100420	Jinpoom	-465.56	-0.461471
				100431	Joa	-454.56	-0.450568
				100413	Joeun	-472.56	-0.46841
				100414	Jojoong	-471.56	-0.467419
				100443	Jopoom	-442.56	-0.438673
				100436	Milsung	-449.56	-0.445612
				100426	Namhae	-459.56	-0.455524
				100424	Ol	-461.56	-0.457506
				100427	Olgeuru	-458.56	-0.454533
				100424	Saeol	-461.56	-0.457506
				100430	Seodun	-455.56	-0.451559
				100430	Sinmichal	-455.56	-0.451559
				100432	Suan	-453.56	-0.449577
				100398	Uri	-487.56	-0.483278
				100417	Younbaek	-468.56	-0.464445
		5	88126	87966.3	Alchan	-159.7	-0.181218
		(X12928)		87948.3	Baekchal	-177.7	-0.201643
				87964.3	Hanbaek	-161.7	-0.183487
				87946.3	Jokyung	-179.7	-0.203913
				87953.3	Joongmo 2008	-172.7	-0.195969
				87958.3	Joongmo 2012	-167.7	-0.190296
				87974.3	Keumkang	-151.7	-0.17214
				87976.3	Tapdong	-149.7	-0.16987
	y	10	67475	67666	Alchan	191.02	0.283097
		(X12929)		67680	Baekchal	205.02	0.303846
				67671	Hanbaek	196.02	0.290508
				67625	Jokyung	150.02	0.222334
				67638	Joongmo 2008	163.02	0.241601
				67675	Jongmo 2012	200.02	0.296436
				67659	Keumkang	184.02	0.272723
				67648	Tapdong	173.02	0.256421
		12	68713	68716	Anbaek	3.02	0.00439509
		(X03041)		68707	Baekjoong	-5.98	-0.00870287
				68690	Chungkye	-22.98	-0.0334435
				68665	Dabun	-47.98	-0.0698267
				68679	Dahong	-33.98	-0.0494521
				68720	Dajoong	7.02	0.0102164
				68678	Eunpa	-34.98	-0.0509074
				68681	Geuru	-31.98	-0.0465414
				68690	Gobun	-22.98	-0.0334435
				68731	Goso	18.02	0.026225
				68709	Hojoong	-3.98	-0.00579221
				68710	Jeokjoong	-2.98	-0.00433688
				68713	Jinpoom	0.02	2.91066e-05
				68726	Joa	13.02	0.0189484
				68711	Joeun	-1.98	-0.00288155
				68709	Jojoong	-3.98	-0.00579221
				68700	Jonong	-12.98	-0.0188902
				68704	Jopoom	-8.98	-0.0130689
				68718	Milsung	5.02	0.00730575
				68726	Namhae	13.02	0.0189484
				68689	Ol	-23.98	-0.0348988
				68722	Olgeru	9.02	0.0131271
				68705	Saeol	-7.98	-0.0116135
				68715	Seodun	2.02	0.00293976
				68689	Sinmichal	-23.98	-0.0348988
				68687	Sinmichal 1	-25.98	-0.0378094
				68681	Suan	-31.98	-0.0465414
				68684	Sukang	-28.98	-0.0421754
				68702	Uri	-10.98	-0.0159795
				68696	Younbaek	-16.98	-0.0247115
1 MW of mature proteins deduced from gene sequences were determined using the Expasy server (https://web.expasy.org/compute_pi/). N/A indicates that the MW could not be determined because gene sequences were not available for the subunit.
2 Molecular weight excluding 4-vp. Most x-type and y-type HMW-GS have 4 and 7 cysteine residues respectively, except for 1Bx20 and 1Dx5 that have 2 and 5 cysteine residues, respectively.
